# Supplementary material
Source: Springer Nature journal article supplement (https://www.springermedizin.de/resource/supplementary/12967_2009_353_MOESM2_ESM.pdf/9576286)
Supplement: MOESM2 [file 9576286]

**Additional file 2. The final factors used for ANOVA analyses.**

Words in italics are the factor names according to the property the factor measures. All numerals indicate concentration in  $\mu\text{mol/L}$  except for ristocetin where the unit of concentration is  $\text{mg/mL}$ . Semicolons separate different concentrations of the same agonist. Crossed out variables were initially part of the respective factors but later on excluded for different reasons (see text). Abbreviations are as follows: ADP = adenosine 5'-diphosphate, Adr = adrenaline, Risto = ristocetin, LPA = lysophosphatidic acid, CRP = C-reactive protein.

|                                                                                                                                                                                                                              |                                                                                                                                                                                                       |                                                                                                                                                                  |                                                                                                                                                             |                                                                                                                                                                                                                                                          |
|------------------------------------------------------------------------------------------------------------------------------------------------------------------------------------------------------------------------------|-------------------------------------------------------------------------------------------------------------------------------------------------------------------------------------------------------|------------------------------------------------------------------------------------------------------------------------------------------------------------------|-------------------------------------------------------------------------------------------------------------------------------------------------------------|----------------------------------------------------------------------------------------------------------------------------------------------------------------------------------------------------------------------------------------------------------|
| <p><b>Factor 1</b><br/><i>(ADP-induced adhesion)</i></p> <p>Albumin Mg ADP 1; 10<br/>Collagen ADP 1<br/>Collagen Mg ADP 1; 10<br/>Fibrinogen Mg ADP 1<br/>Albumin-ADP 1; 10<br/>Collagen-ADP 10<br/>Fibrinogen-Mg-ADP 10</p> | <p><b>Factor 2</b><br/><i>(Absent adhesion)</i></p> <p>Albumin<br/>Albumin-ADP 0.1<br/>Albumin-Adr 0.1<br/>Albumin-LPA 1<br/>Albumin-LPA 1+Adr 0.1<br/>Albumin-Mg<br/>Albumin-Mg-Adr 0.1</p>          | <p>Albumin-Mg-LPA 1; 10<br/>Collagen<br/>Collagen-ADP 0.1<br/>Collagen-Adr 0.1<br/>Collagen-LPA 1; 10<br/>Collagen-LPA 1+Adr 0.1<br/>Collagen-LPA 10+Adr 0.1</p> | <p><b>Factor 3</b><br/><i>(Adrenaline-induced adhesion)</i></p> <p>Albumin Adr 1<br/>Albumin Adr 0.1+Risto 1<br/>Albumin Mg Adr 1<br/>Collagen Mg Adr 1</p> | <p><b>Factor 4</b><br/><i>(Ristocetin-induced adhesion)</i></p> <p>Collagen Risto<br/>Collagen Adr 0.1+Risto 1<br/>Collagen Mg Risto 1<br/>Fibrinogen Mg Risto 1<br/>Collagen-ADP 0.1+Risto 1<br/>Collagen-LPA 1+Risto 1<br/>Collagen-LPA 10+Risto 1</p> |
| <p><b>Factor 5</b><br/><i>(Adhesion to Fibrinogen)</i></p> <p>Fibrinogen Mg<br/>Fibrinogen-Mg-Adr 1<br/>Fibrinogen-Mg-Adr 0.1<br/>Fibrinogen-Mg-LPA 1; 10</p>                                                                | <p><b>Factor 6</b> <i>(Ristocetin-induced adhesion to albumin)</i></p> <p>Albumin Risto 1<br/>Albumin ADP 0.1+Risto 1<br/>Albumin LPA 10+Risto 1<br/>Albumin Mg Risto 1<br/>Albumin LPA 1+Risto 1</p> | <p><b>Factor 7</b> <i>(LPA-induced adhesion to albumin)</i></p> <p>Albumin LPA 10<br/>Albumin LPA 10+Adr 0.1</p>                                                 | <p><b>Factor 8</b><br/><i>(Adhesion to Collagen)</i></p> <p>Collagen Mg<br/>Collagen Adr 1<br/>Collagen-Mg-Adr 0.1<br/>Collagen-Mg-LPA 1; 10</p>            | <p><b>Factor 9</b><br/><i>(Inflammation)</i></p> <p>CRP<br/>Leukocyte count</p>                                                                                                                                                                          |
| <p><b>Factor 10</b><br/><i>(HDL)</i></p> <p>HDL-cholesterol<br/>Apo-A1</p>                                                                                                                                                   | <p><b>Factor 11</b><br/><i>(LDL)</i></p> <p>LDL-cholesterol<br/>Apo-B<br/>Cholesterol<br/>Triglycerides</p>                                                                                           | <p><b>Factor 12</b><br/><i>(Platelet count)</i></p> <p>Platelet count</p>                                                                                        | <p><b>Factor 14</b> <i>(ADP, flow cytometry)</i></p> <p>Fibrinogen ADP 0.1; 0.6<br/>P-selectin ADP 0.6</p>                                                  | <p><b>Factor 15</b> <i>(SFLLRN, flow cytometry)</i></p> <p>Fibrinogen SFLLRN 5.3<br/>P-selectin SFLLRN 5.3</p>                                                                                                                                           |
|                                                                                                                                                                                                                              |                                                                                                                                                                                                       | <p><b>Factor 13</b> <i>(TXB<sub>2</sub>)</i></p> <p>TXB<sub>2</sub></p>                                                                                          |                                                                                                                                                             |                                                                                                                                                                                                                                                          |
